# Supplementary material
Source: PubMed Central journal article supplement (PMC6583440)
Supplement: jamapediatr-173-68-s001.pdf [file jamapediatr-173-68-s001.pdf]

## Supplementary Online Content

Hwang TJ, Orenstein L, Kesselheim AS, Bourgeois FT. Completion rate and reporting of mandatory pediatric postmarketing studies under the US Pediatric Research Equity Act. *JAMA Pediatr*. Published online November 19, 2018.  
doi:10.1001/jamapediatrics.2018.3416

**eTable 1.** PREA Studies With Status Provided by the FDA

**eTable 2.** List of Included New Drugs and Supplemental Indications Approved by the FDA

This supplementary material has been provided by the authors to give readers additional information about their work.

**eTable 1. PREA Studies With Status Provided by the FDA**

| <b>Drug</b>                     | <b>Study description</b>                                                                                                                                                                                                                                                                                                                                                                                                                                   | <b>Type</b>       | <b>Status</b>   |
|---------------------------------|------------------------------------------------------------------------------------------------------------------------------------------------------------------------------------------------------------------------------------------------------------------------------------------------------------------------------------------------------------------------------------------------------------------------------------------------------------|-------------------|-----------------|
| Maraviroc (Selzentry)           | Deferred pediatric study under PREA for the treatment of HIV in pediatric subjects from birth to $\leq 2$ years of age. This study will determine the maraviroc exposure (pharmacokinetic profile) followed by 48 weeks of dosing with efficacy based on viral load reduction through 48 weeks of dosing, and safety monitored over 96 weeks for pediatric subjects from birth to 2 years of age to support maraviroc dose selection, safety and efficacy. | New drug approval | Released (2015) |
| Methylnaltrexone (Relistor)     | Conduct a pharmacokinetics and safety study of Relistor in pediatric patients ages 5 to 17 years with opioid induced constipation and advanced illness receiving palliative care.                                                                                                                                                                                                                                                                          | New drug approval | Released (2012) |
| Tapentadol (Nucynta)            | Treatment of moderate to severe acute pain in pediatric patients                                                                                                                                                                                                                                                                                                                                                                                           | New drug approval | Ongoing         |
| Vilazodone (Viibryd)            | Deferred pediatric study under PREA for the treatment of major depressive disorder in pediatric patients aged 7 to 17. Conduct a study to obtain pharmacokinetic, safety, and tolerability data and provide information pertinent to dosing of vilazodone in the relevant pediatric population                                                                                                                                                             | New drug approval | Released (2014) |
| Perampanel (Fycompa)            | A prospective, randomized, controlled, double-blind, efficacy and safety study of FYCOMPA (perampanel) in children ages 2 years to $< 12$ years for the adjunctive treatment of partial onset seizures with a long term safety extension. The primary efficacy endpoint during the controlled phase will examine seizure frequency based upon diary data. Safety will be evaluated during the controlled phase and long term extension.                    | New drug approval | Released (2016) |
| Levetiracetam (Keppra)          | Deferred pediatric study under PREA for adjunctive therapy in the treatment of primary generalized tonic-clonic seizures in pediatric patients ages 2 to 6 years of age with idiopathic generalized epilepsy.                                                                                                                                                                                                                                              | New indication    | Released (2007) |
| Peginterferon alfa-2a (Pegasys) | Evaluate the safety and antiviral effectiveness (as measured by sustained virologic response (SVR)) of Pegasys/Copegus combination therapy in pediatric patients by conducting an open-label, study of HCV-infected patients 3 to 5                                                                                                                                                                                                                        | New indication    | Released (2014) |

| <b>Drug</b>          | <b>Study description</b>                                                                                                                                                                                                                                                                                                                                                                    | <b>Type</b>       | <b>Status</b>    |
|----------------------|---------------------------------------------------------------------------------------------------------------------------------------------------------------------------------------------------------------------------------------------------------------------------------------------------------------------------------------------------------------------------------------------|-------------------|------------------|
|                      | years of age. The study must provide safety                                                                                                                                                                                                                                                                                                                                                 |                   |                  |
|                      | and SVR data for at least 10 subjects 3 to 5 years of age who receive the Copegus oral solution formulation in combination with Pegasys. Analysis of safety and effectiveness should be conducted when all subjects in the 3 to 5 year age group have reached 24 weeks post-treatment, and these interim analyses should be submitted to FDA for review.                                    |                   |                  |
| Tenofovir (Viread)   | Deferred pediatric study under PREA for the treatment of chronic hepatitis B virus infection in pediatric patients ages birth to <2 years of age.                                                                                                                                                                                                                                           | New indication    | Released (2015)  |
| Vigabatrin (Sabril)  | The study is to be a multi-center, randomized, placebo-controlled double blind parallel design study evaluating the safety and efficacy of several fixed doses of Sabril (vigabatrin) as adjunctive therapy in pediatric patients age 10 years and above with refractory complex partial seizures. Adequate visual monitoring and stopping rules must be incorporated into this study.      | New drug approval | Fulfilled (2013) |
| Darunavir (Prezista) | Deferred pediatric study under PREA for the treatment of HIV-1 infection in treatment-naïve pediatric subjects from 3 to <12 years of age. Conduct a pediatric safety and activity study of darunavir, in combination with ritonavir, in the treatment-naïve population with activity based on the results of virologic response over at least 24 weeks of dosing and safety over 48 weeks. | New indication    | Fulfilled (2013) |

**eTable 2.** List of Included New Drugs and Supplemental Indications Approved by the FDA

| Generic name  | Brand name | Summary Indication                                                                                                                                                                                                                                                                                                                                                 | FDA Approval Date |
|---------------|------------|--------------------------------------------------------------------------------------------------------------------------------------------------------------------------------------------------------------------------------------------------------------------------------------------------------------------------------------------------------------------|-------------------|
| abatacept     | Orencia    | Treatment of moderate to severe polyarticular juvenile idiopathic arthritis (JIA)                                                                                                                                                                                                                                                                                  | Apr-08            |
| adalimumab    | Humira     | Treatment of adult patients with moderate to severe chronic plaque psoriasis who are candidates for systemic therapy or phototherapy, and when other systemic therapies are medically less appropriate                                                                                                                                                             | Jan-08            |
| adalimumab    | Humira     | Reducing signs and symptoms and inducing and maintaining clinical remission in adult patients with moderately to severely active Crohn's disease who have had an inadequate response to conventional therapy; and reducing signs and symptoms and inducing clinical remission in these patients if they have also lost response to or are intolerant to infliximab | Feb-07            |
| albiglutide   | Tanzeum    | Adjunct to diet and exercise to improve glycemic control in adults with type 2 diabetes mellitus                                                                                                                                                                                                                                                                   | Apr-14            |
| aliskiren     | Tekturna   | Treatment of hypertension                                                                                                                                                                                                                                                                                                                                          | Mar-07            |
| alogliptin    | Nesina     | Adjunct to diet and exercise to improve glycemic control in adults with type 2 diabetes mellitus                                                                                                                                                                                                                                                                   | Jan-13            |
| alvimopan     | Entereg    | Treatment for the acceleration of time to gastrointestinal recovery following partial large or small bowel resection surgery with primary anastomosis                                                                                                                                                                                                              | May-08            |
| aripiprazole  | Abilify    | Treatment of irritability associated with autistic disorder in pediatric patients (aged 6 to 17 years)                                                                                                                                                                                                                                                             | Nov-09            |
| asenapine     | Saphris    | Acute treatment of schizophrenia in adults; and Acute treatment of manic or mixed episodes associated with bipolar I disorder in adults                                                                                                                                                                                                                            | Aug-09            |
| atazanavir    | Reyataz    | Treatment of HIV-1 infection in pediatric patients (ages 6 to 18 years of age)                                                                                                                                                                                                                                                                                     | Mar-08            |
| azilsartan    | Edarbi     | Hypertension, either alone or in combination with other antihypertensive agents                                                                                                                                                                                                                                                                                    | Feb-11            |
| belimumab     | Benlysta   | Active, autoantibody-positive lupus (systemic lupus erythematosus) who are receiving standard therapy, including corticosteroids, antimalarials, immunosuppressives, and nonsteroidal anti-inflammatory drugs                                                                                                                                                      | Mar-11            |
| boceprevir    | Victrelis  | Chronic hepatitis C (CHC) genotype 1 infection, in combination with peginterferon alfa and ribavirin, in adult patients ( $\geq 18$ years of age) with compensated liver disease, including cirrhosis, who are previously untreated or who have failed previous interferon and ribavirin therapy                                                                   | May-11            |
| canagliflozin | Invokana   | Adjunct to diet and exercise to improve glycemic control in adults with type 2 diabetes mellitus                                                                                                                                                                                                                                                                   | Mar-13            |
| caspofungin   | Cancidas   | In pediatric patients (3 months to 16 years of age), empirical therapy for presumed fungal infections in                                                                                                                                                                                                                                                           | Jul-08            |

| Generic name               | Brand name | Summary Indication                                                                                                                                                                                                                      | FDA Approval Date |
|----------------------------|------------|-----------------------------------------------------------------------------------------------------------------------------------------------------------------------------------------------------------------------------------------|-------------------|
|                            |            | febrile, neutropenic patients                                                                                                                                                                                                           |                   |
| ceftaroline                | Teflaro    | Acute bacterial skin and skin structure infections and community acquired pneumonia                                                                                                                                                     | Oct-10            |
| ceftolozane/<br>tazobactam | Zerbaxa    | Treat adults with complicated intra-abdominal infections (cIAI) and complicated urinary tract infections (cUTI)                                                                                                                         | Dec-14            |
| certolizumab               | Cimzia     | Provides for the treatment of reducing the signs and symptoms of Crohn's disease and maintaining clinical response in adult patients with moderately to severely active disease who have an inadequate response to conventional therapy | Apr-08            |
| certolizumab               | Cimzia     | Treatment of adults with moderately to severely active rheumatoid arthritis                                                                                                                                                             | May-09            |
| clevidipine                | Cleviprex  | Reduces blood pressure when use of oral therapy is not feasible or not desirable                                                                                                                                                        | Aug-08            |
| colesevelam                | Welchol    | Reduction of LDL-C levels in boys and postmenarchal girls, 10 to 17 years of age, with heterozygous familial hypercholesterolemia as monotherapy or in combination with a statin after failing an adequate trial of diet therapy        | Oct-09            |
| crofelemer                 | Fulyzaq    | Symptomatic relief of non-infectious diarrhea in adult patients with HIV/AIDS on anti-retroviral therapy                                                                                                                                | Dec-12            |
| dabigatran                 | Pradaxa    | Treatment of deep venous thrombosis (DVT) and pulmonary embolism (PE) in patients who have been treated with a parenteral anticoagulant for 5-10 days                                                                                   | Apr-14            |
| dalbavancin                | Dalvance   | Acute bacterial skin and skin structure infections (ABSSSI) caused by designated susceptible strains of Gram-positive microorganisms                                                                                                    | May-14            |
| dalteparin                 | Fragmin    | Extended treatment of symptomatic venous thromboembolism (VTE) [proximal deep vein thrombosis (DVT) and/or pulmonary embolism (PE)] to reduce the recurrence of VTE in patients with cancer                                             | May-07            |
| dapagliflozin              | Farxiga    | Adjunct to diet and exercise to improve glycemic control in adults with type 2 diabetes mellitus                                                                                                                                        | Jan-14            |
| darunavir                  | Prezista   | Treatment of human immunodeficiency virus (HIV) in antiretroviral treatment-naïve adults                                                                                                                                                | Dec-08            |
| desvenlafaxine             | Pristiq    | Major depressive disorder                                                                                                                                                                                                               | Feb-08            |
| dexmedetomidine            | Precedex   | Sedation of non-intubated patients prior to and/or during surgical and other procedures                                                                                                                                                 | Oct-08            |
| difluprednate              | Durezol    | Inflammation and pain associated with ocular surgery                                                                                                                                                                                    | Jun-08            |
| dimethyl fumarate          | Tecfidera  | Relapsing forms of multiple sclerosis                                                                                                                                                                                                   | Mar-13            |
| dolutegravir               | Tivicay    | HIV-1 infection in adults and children aged 12 years and older and weighing at least 40 kg                                                                                                                                              | Aug-13            |
| doripenem                  | Doribax    | Complicated intra-abdominal (cIAI) and complicated urinary tract (cUTI) infections caused by susceptible isolates of the designated microorganisms                                                                                      | Oct-07            |
| dulaglutide                | Trulicity  | Adjunct to diet and exercise to improve glycemic control in adults with type 2 diabetes mellitus                                                                                                                                        | Sep-14            |
| efinaconazole              | Jublia     | Topical treatment of onychomycosis of the toenails                                                                                                                                                                                      | Jun-14            |

| Generic name                                       | Brand name | Summary Indication                                                                                                                                                                                                                                                                                             | FDA Approval Date |
|----------------------------------------------------|------------|----------------------------------------------------------------------------------------------------------------------------------------------------------------------------------------------------------------------------------------------------------------------------------------------------------------|-------------------|
|                                                    |            | due to Trichophyton rubrum and Trichophyton mentagrophytes                                                                                                                                                                                                                                                     |                   |
| elvitegravir, cobicistat, emtricitabine, tenofovir | Stribild   | Treatment of HIV-1 infection in adults who are antiretroviral treatment-naïve                                                                                                                                                                                                                                  | Aug-12            |
| empagliflozin                                      | Jardiance  | Adjunct to diet and exercise to improve glycemic control in adults with type 2 diabetes mellitus                                                                                                                                                                                                               | Aug-14            |
| eslicarbazepine                                    | Aptiom     | Adjunctive treatment of partial-onset seizures                                                                                                                                                                                                                                                                 | Nov-13            |
| etravirine                                         | Intelence  | Provides in combination with other antiretroviral agents for the treatment of hiv-1 infection in treatment-experienced adult patients, who have evidence of viral replication and hiv-1 strains resistant to a non-nucleoside reverse transcriptase inhibitor (NNRTI) and other antiretroviral agents.         | Jan-08            |
| ezogabine                                          | Potiga     | Adjunctive treatment of partial-onset seizures in patients aged 18 years and older                                                                                                                                                                                                                             | Jun-11            |
| fesoterodine                                       | Toviaz     | Overactive bladder with symptoms of urge urinary incontinence, urgency, and frequency                                                                                                                                                                                                                          | Oct-08            |
| fidaxomicin                                        | Dificid    | Clostridium difficile-associated diarrhea (CDAD)                                                                                                                                                                                                                                                               | May-11            |
| fingolimod                                         | Gilenya    | Relapsing forms of multiple sclerosis to reduce the frequency of relapses and to delay the accumulation of physical disability                                                                                                                                                                                 | Sep-10            |
| fospropofol                                        | Lusedra    | Sedative hypnotic agent indicated for monitored anesthesia care (MAC) sedation in adult patients undergoing diagnostic or therapeutic procedure                                                                                                                                                                | Dec-08            |
| gabapentin                                         | Horizant   | Moderate-to-severe primary Restless Legs Syndrome (RLS) in adults                                                                                                                                                                                                                                              | Apr-11            |
| gadobutrol                                         | Gadavist   | Contrast agent indicated for intravenous use in diagnostic MRI in adults and children (2 years of age and older) to detect and visualize areas with disrupted blood brain barrier (BBB) and/or abnormal vascularity of the central nervous system                                                              | Mar-11            |
| gadoterate                                         | Dotarem    | Contrast agent indicated for intravenous use with magnetic resonance imaging (MRI) in brain (intracranial), spine and associated tissues in adult and pediatric patients (2 years of age and older) to detect and visualize areas with disruption of the blood brain barrier (BBB) and/or abnormal vascularity | Mar-13            |
| gadoxetate                                         | Eovist     | Contrast agent for use in magnetic resonance imaging (mri) of the liver in adult patients to provide contrast in the t1 weighted images to aid in the detection and characterization of focal liver pathologies in pre-surgical evaluation                                                                     | Jul-08            |
| golimumab                                          | Simponi    | Moderately to severely active Rheumatoid Arthritis (RA) in adults, in combination with methotrexate; Active Psoriatic Arthritis (PsA) in adults, alone or in combination with methotrexate; Active Ankylosing Spondylitis in adults                                                                            | Apr-09            |
| iloperidone                                        | Fanapt     | Acute treatment of schizophrenia in adults                                                                                                                                                                                                                                                                     | May-09            |
| lacosamide                                         | Vimpat     | Adjunctive therapy for partial onset seizures in                                                                                                                                                                                                                                                               | Oct-08            |

| Generic name                             | Brand name | Summary Indication                                                                                                                                                                                                                                                                                                                                                     | FDA Approval Date |
|------------------------------------------|------------|------------------------------------------------------------------------------------------------------------------------------------------------------------------------------------------------------------------------------------------------------------------------------------------------------------------------------------------------------------------------|-------------------|
|                                          |            | patients with epilepsy 17 years or older; indicated as short-term replacement when oral administration is not feasible in these patients                                                                                                                                                                                                                               |                   |
| lacosamide                               | Vimpat     | Use as monotherapy (conversion to and initial) in the treatment of partial-onset seizures in patients with epilepsy age 17 years and older                                                                                                                                                                                                                             | Aug-14            |
| ledipasvir/<br>sofosbuvir                | Harvoni    | Chronic hepatitis C (CHC) genotype 1 infection in adults                                                                                                                                                                                                                                                                                                               | Oct-14            |
| levetiracetam                            | Keppra     | Adjunctive therapy in the treatment of primary generalized tonic-clonic seizures in adults and children 6 years of age and older with idiopathic generalized epilepsy                                                                                                                                                                                                  | Mar-07            |
| linaclotide                              | Linzess    | Irritable bowel syndrome with constipation (IBS-C) and Chronic idiopathic constipation (CIC) in adults                                                                                                                                                                                                                                                                 | Aug-12            |
| linagliptin                              | Tradjenta  | Adjunct to diet and exercise to improve glycemic control in adults with type 2 diabetes mellitus                                                                                                                                                                                                                                                                       | May-11            |
| liraglutide                              | Victoza    | Adjunct to diet and exercise to improve glycemic control in adults with type 2 diabetes mellitus                                                                                                                                                                                                                                                                       | Jan-10            |
| lisdexamfetamine                         | Vyvanse    | Treatment of Attention Deficit Hyperactivity Disorder (ADHD) in children 6-12 years of age                                                                                                                                                                                                                                                                             | Feb-07            |
| lorcaserin                               | Belviq     | Adjunct to a reduced-calorie diet and increased physical activity for chronic weight management in adults with an initial body mass index (BMI) of: • 30 kg/m <sup>2</sup> or greater (obese) or • 27 kg/m <sup>2</sup> or greater (overweight) in the presence of at least one weight-related comorbid condition, (e.g., hypertension, dyslipidemia, type 2 diabetes) | Jun-12            |
| lubiprostone                             | Amitiza    | Treatment of Irritable Bowel Syndrome with constipation in women ≥18 years old                                                                                                                                                                                                                                                                                         | Apr-08            |
| luliconazole                             | Luzu       | Topical treatment of interdigital tinea pedis, tinea cruris, and tinea corporis caused by the organisms Trichophyton rubrum and Epidermophyton floccosum, in patients 18 years of age and older                                                                                                                                                                        | Nov-13            |
| lurasidone                               | Latuda     | Treatment of patients with depressive episodes associated with bipolar I disorder (bipolar depression)                                                                                                                                                                                                                                                                 | Jun-13            |
| lurasidone                               | Latuda     | Schizophrenia in adults                                                                                                                                                                                                                                                                                                                                                | Oct-10            |
| maraviroc                                | Selzentry  | CCR5-tropic HIV-1 infection                                                                                                                                                                                                                                                                                                                                            | Aug-07            |
| methoxy polyethylene glycol-epoetin beta | Mircera    | Treatment of anemia associated with chronic renal failure, including patients on dialysis and patients not on dialysis                                                                                                                                                                                                                                                 | Nov-07            |
| methylnaltrexone                         | Relistor   | Provides for the treatment of opioid-induced constipation in patients with advanced illness who are receiving palliative care, when response to laxative therapy has not been sufficient                                                                                                                                                                               | Apr-08            |
| micafungin                               | Mycamine   | Treatment of patients with candidemia, acute disseminated candidiasis, Candida peritonitis and abscesses                                                                                                                                                                                                                                                               | Jan-08            |
| milnacipran                              | Savella    | Selective serotonin and norepinephrine reuptake inhibitor (SNRI) indicated for the management of fibromyalgia                                                                                                                                                                                                                                                          | Jan-09            |

| <b>Generic name</b>                                     | <b>Brand name</b> | <b>Summary Indication</b>                                                                                                                                                                                                                              | <b>FDA Approval Date</b> |
|---------------------------------------------------------|-------------------|--------------------------------------------------------------------------------------------------------------------------------------------------------------------------------------------------------------------------------------------------------|--------------------------|
| mirabegron                                              | Myrbetriq         | Overactive bladder (OAB) with symptoms of urge urinary incontinence, urgency, and urinary frequency                                                                                                                                                    | Jun-12                   |
| montelukast                                             | Singulair         | Prevention of exercise-induced bronchoconstriction in patients 15 years of age and older                                                                                                                                                               | Apr-07                   |
| netupitant;<br>palonosetron                             | Akynzeo           | Prevention of acute and delayed nausea and vomiting associated with initial and repeat courses of cancer chemotherapy, including, but not limited to, highly emetogenic chemotherapy                                                                   | Oct-14                   |
| ocriplasmin                                             | Jetrea            | Symptomatic vitreomacular adhesion                                                                                                                                                                                                                     | Oct-12                   |
| ombitasvir,<br>paritaprevir and<br>ritonavir; dasabuvir | Viekira Pak       | Genotype 1 chronic hepatitis C virus (HCV) infection including those with compensated cirrhosis                                                                                                                                                        | Dec-14                   |
| onabotulinumtoxina                                      | Botox             | Treatment of overactive bladder with symptoms of urinary incontinence, urgency, and frequency, in adults who have had an inadequate response to or are intolerant of an anticholinergic medication                                                     | Jan-13                   |
| onabotulinumtoxina                                      | Botox             | Treatment of adults with urinary incontinence due to detrusor overactivity associated with a neurologic condition (e.g., spinal cord injury, multiple sclerosis) who have an inadequate response to or are intolerant of an anticholinergic medication | Aug-11                   |
| onabotulinumtoxina                                      | Botox             | Prophylaxis of headaches in adults with chronic migraine                                                                                                                                                                                               | Oct-10                   |
| onabotulinumtoxina                                      | Botox             | Treatment of upper limb spasticity                                                                                                                                                                                                                     | Mar-10                   |
| oritavancin                                             | Orbactiv          | Acute bacterial skin and skin structure infections caused or suspected to be caused by susceptible isolates of designated Gram-positive microorganisms                                                                                                 | Aug-14                   |
| palonosetron                                            | Aloxi             | Prevention of postoperative nausea and vomiting for up to 24 hours following surgery                                                                                                                                                                   | Feb-08                   |
| peginesatide                                            | Omontys           | Treatment of anemia due to chronic kidney disease (CKD) in adult patients on dialysis                                                                                                                                                                  | Mar-12                   |
| peginterferon alfa-2a                                   | Pegasys           | Treatment of chronic hepatitis C in combination with Copegus in patients 5 to 17 years of age                                                                                                                                                          | Aug-11                   |
| peginterferon beta-1a                                   | Plegridy          | Relapsing forms of multiple sclerosis                                                                                                                                                                                                                  | Aug-14                   |
| peramivir                                               | Rapivab           | Acute uncomplicated influenza in patients 18 years and older who have been symptomatic for no more than two days                                                                                                                                       | Dec-14                   |
| perampanel                                              | Fycompa           | Adjunctive therapy for the treatment of partial-onset seizures with or without secondarily generalized seizures in patients with epilepsy aged 12 years and older                                                                                      | Oct-12                   |
| pregabalin                                              | Lyrica            | Management of fibromyalgia                                                                                                                                                                                                                             | Jun-07                   |
| raltegravir                                             | Isentress         | In combination with other antiretroviral agents for the treatment of HIV-1 infection in treatment-experienced adult patients who have evidence of viral replication and HIV-1 strains resistant to multiple antiretroviral agents                      | Oct-07                   |
| retapamulin                                             | Altabax           | Impetigo                                                                                                                                                                                                                                               | Apr-07                   |
| rilpivirine                                             | Edurant           | In combination with other antiretroviral agents for the treatment of HIV-1 infection in treatment-naïve adult patients                                                                                                                                 | May-11                   |



| <b>Generic name</b>                                 | <b>Brand name</b> | <b>Summary Indication</b>                                                                                                                                                                                                                                                   | <b>FDA Approval Date</b> |
|-----------------------------------------------------|-------------------|-----------------------------------------------------------------------------------------------------------------------------------------------------------------------------------------------------------------------------------------------------------------------------|--------------------------|
| rivaroxaban                                         | Xarelto           | Treatment and reduction in risk for pulmonary embolism and deep vein thrombosis                                                                                                                                                                                             | Nov-12                   |
| saxagliptin                                         | Onglyza           | Adjunct to diet and exercise to improve glycemic control in adults with type 2 diabetes mellitus                                                                                                                                                                            | Jul-09                   |
| simeprevir                                          | Olysio            | Chronic hepatitis C (CHC) infection as a component of a combination antiviral treatment regimen                                                                                                                                                                             | Nov-13                   |
| sodium picosulfate, magnesium oxide and citric acid | Prepopik          | Cleansing of the colon as a preparation for colonoscopy in adults                                                                                                                                                                                                           | Jul-12                   |
| sofosbuvir                                          | Sovaldi           | Chronic hepatitis C (CHC) infection as a component of a combination antiviral treatment regimen                                                                                                                                                                             | Dec-13                   |
| spinosad                                            | Natroba           | Head lice infestation in patients ages 4 years and older                                                                                                                                                                                                                    | Jan-11                   |
| sulfur hexafluoride lipid microsphere               | Lumason           | Ultrasound contrast agent indicated for use in patients with suboptimal echocardiograms to opacify the left ventricular chamber and to improve the delineation of the left ventricular endocardial border                                                                   | Oct-14                   |
| tapentadol                                          | Nucynta           | Opioid analgesic indicated for the relief of moderate to severe acute pain in patients 18 years of age or older                                                                                                                                                             | Nov-08                   |
| tavaborole                                          | Kerydin           | Topical treatment of onychomycosis of the toenails due to Trichophyton rubrum or Trichophyton mentagrophytes                                                                                                                                                                | Jul-14                   |
| tbo-filgrastim                                      | Neutroval         | Reduction in the duration of severe neutropenia in patients with non-myeloid malignancies receiving myelosuppressive anti-cancer drugs associated with a clinically significant incidence of febrile neutropenia                                                            | Aug-12                   |
| tedizolid                                           | Sivextro          | Acute bacterial skin and skin structure infections (ABSSSI) caused by designated susceptible bacteria                                                                                                                                                                       | Jun-14                   |
| telaprevir                                          | Incivek           | Genotype 1 chronic hepatitis C (CHC) in adult patients with compensated liver disease, including cirrhosis, who are treatment-naïve or who have been previously treated with interferon-based treatment, including prior null responders, partial responders, and relapsers | May-11                   |
| telavancin                                          | Vibativ           | Treatment of hospital-acquired bacterial pneumonia/ventilator-associated bacterial pneumonia (HABP/VABP) caused by susceptible isolates of Staphylococcus aureus (including methicillin-susceptible and resistant isolates) when alternative treatments are not suitable    | Jun-13                   |
| telavancin                                          | Vibativ           | Complicated skin and skin structure infections (cSSSI) caused by susceptible Gram-positive bacteria                                                                                                                                                                         | Sep-09                   |
| tenofovir                                           | Viread            | Treatment of Chronic Hepatitis B                                                                                                                                                                                                                                            | Aug-08                   |
| teriflunomide                                       | Aubagio           | Relapsing forms of multiple sclerosis                                                                                                                                                                                                                                       | Sep-12                   |
| tigecycline                                         | Tygacil           | Treatment of community acquired bacterial pneumonia                                                                                                                                                                                                                         | Mar-09                   |
| tocilizumab                                         | Actemra           | Adult patients with moderately-to severely- active rheumatoid arthritis who have had an inadequate response to one or more TNF antagonist therapies                                                                                                                         | Jan-10                   |

| <b>Generic name</b> | <b>Brand name</b> | <b>Summary Indication</b>                                                                                                                                                                                                                                                                                                                                                                                                                                                                                                                                                              | <b>FDA Approval Date</b> |
|---------------------|-------------------|----------------------------------------------------------------------------------------------------------------------------------------------------------------------------------------------------------------------------------------------------------------------------------------------------------------------------------------------------------------------------------------------------------------------------------------------------------------------------------------------------------------------------------------------------------------------------------------|--------------------------|
| tocilizumab         | Actemra           | Treatment of active systemic juvenile idiopathic arthritis in patients 2 years of age and older                                                                                                                                                                                                                                                                                                                                                                                                                                                                                        | Apr-11                   |
| tofacitinib         | Xeljanz           | Moderately to severely active rheumatoid arthritis who have had an inadequate response or intolerance to methotrexate. It may be used as monotherapy or in combination with methotrexate or other nonbiologic disease-modifying antirheumatic drugs (DMARDs)                                                                                                                                                                                                                                                                                                                           | Nov-12                   |
| tolvaptan           | Samsca            | Treatment of clinically significant hypervolemic and euvolemic hyponatremia [serum sodium < 125 mEq/L or less marked hyponatremia that is symptomatic and has resisted correction with fluid restriction], including patients with heart failure, cirrhosis, and Syndrome of Inappropriate Antidiuretic Hormone (SIADH)                                                                                                                                                                                                                                                                | May-09                   |
| ustekinumab         | Stelara           | Moderate to severe plaque psoriasis who are candidates for phototherapy or systemic therapy                                                                                                                                                                                                                                                                                                                                                                                                                                                                                            | Sep-09                   |
| vedolizumab         | Entyvio           | Adult patients with moderately to severely active UC who have had an inadequate response with, lost response to, or were intolerant to a tumor necrosis factor (TNF) blocker or immunomodulator; or had an inadequate response with, were intolerant to, or demonstrated dependence on corticosteroids; Adult patients with moderately to severely active CD who have had an inadequate response with, lost response to, or were intolerant to a TNF blocker or immunomodulator; or had an inadequate response with, were intolerant to, or demonstrated dependence on corticosteroids | May-14                   |
| vigabatrin          | Sabril            | Refractory complex partial seizures in adults; should be used as adjunctive therapy in patients who have responded inadequately to several alternative treatments                                                                                                                                                                                                                                                                                                                                                                                                                      | Aug-09                   |
| vilazodone          | Viiibryd          | Major depressive disorder in adults                                                                                                                                                                                                                                                                                                                                                                                                                                                                                                                                                    | Jan-11                   |
| vortioxetine        | Brintellix        | Major depressive disorder                                                                                                                                                                                                                                                                                                                                                                                                                                                                                                                                                              | Sep-13                   |
